# Supplementary material for: Ethanolic Fenugreek Extract: Its Molecular Mechanisms against Skin Aging and the Enhanced Functions by Nanoencapsulation
Source: MDPI journal article supplement (doi:10.3390/ph15020254), 2022-02-20
Supplement: s1 [file s1]

## Supplementary Data:

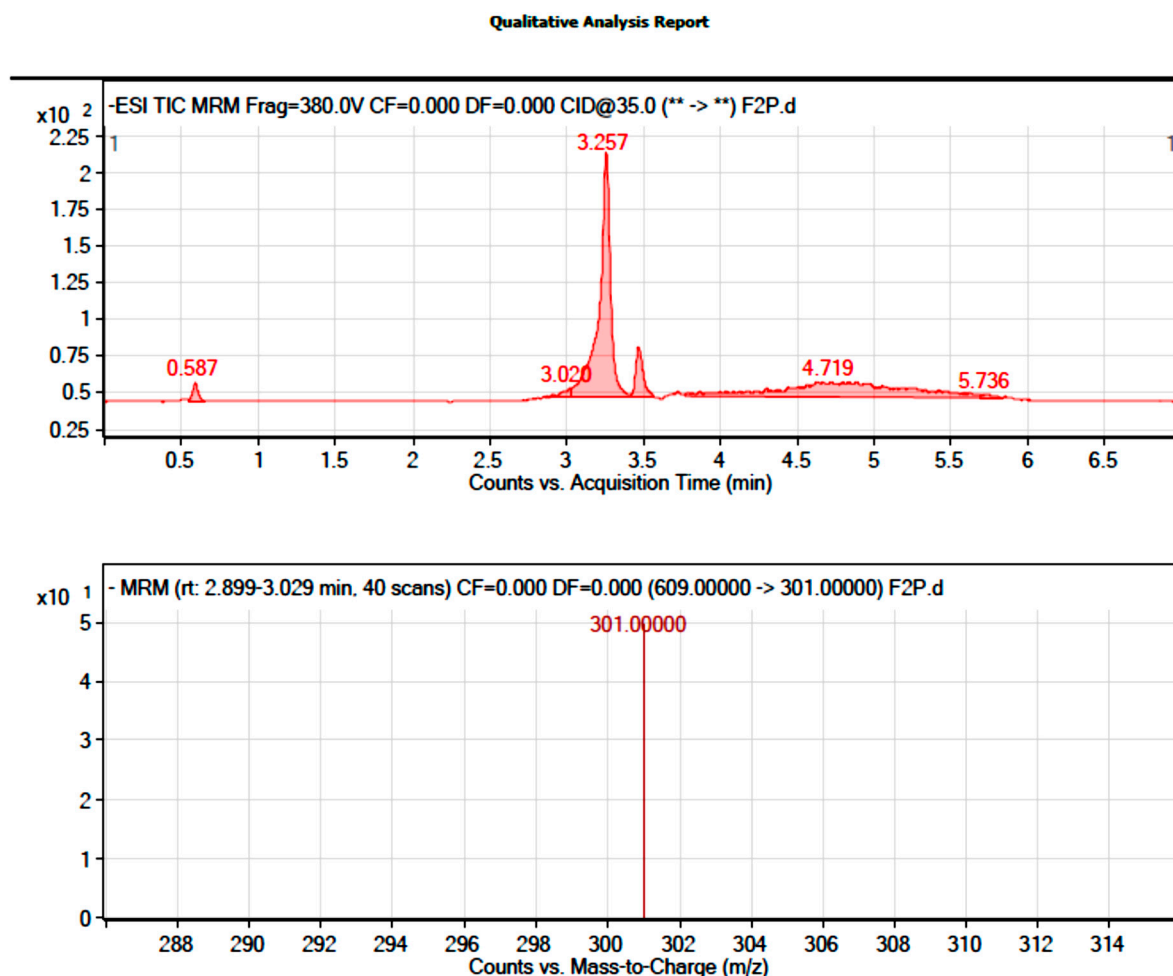

**Supplementary Figure S1:** LC-MS Chromatogram of fenugreek extract and the detected Ion of Rutin. Chromatographic separation was accomplished on a SUPLECO Titan C18 column (5 cm × 2.1 mm, 1.9  $\mu$ m, SUPLECO, USA) at 30 °C with a 6 min gradient elution using acetonitrile and 0.05% formic acid aqueous solution as mobile phase at a flow rate of 0.25 mL min<sup>-1</sup>. A tandem mass spectrometric detection was conducted using multiple reaction monitoring (MRM) via an electrospray ionization (ESI) source and operating in the negative ionization mode. Molecular weight of Rutin was 609 g/mol, corresponding to precursor Ion 609 (MS1 Res: Unit) and detected Product Ion 301 (MS2 Res: Unit).

**Supplementary Table S1:** Physicochemical properties of Liposome encapsulating fenugreek extract (LF) and niosome encapsulating fenugreek extract (NF).

| Parameters                 | Initial       |                |              |                |
|----------------------------|---------------|----------------|--------------|----------------|
|                            | Blank-LF      | LF             | Blank-NF     | NF             |
| Size (nm)                  | 177.33 ± 2.89 | 224.27 ± 10.03 | 89.19 ± 1.40 | 264.53 ± 22.86 |
| Polydispersity index (PdI) | 0.24 ± 0.02   | 0.25 ± 0.02    | 0.29 ± 0.01  | 0.78 ± 0.19    |
| ζ potential (mV)           | 0.06 ± 0.34   | -1.40 ± 0.72   | -2.32 ± 0.21 | -4.12 ± 0.41   |
